# Supplementary material for: Towards tuning the modality of hierarchical macro-nanoporous metals by controlling the dealloying kinetics of close-to-eutectic alloys
Source: Royal Society of Chemistry journal article supplement (doi:10.1039/d1cp03878h), 2021-01-01
Supplement: d1cp03878h1.pdf [file d1cp03878h1.pdf]

## Towards Tuning the Modality of Hierarchical Macro-Nanoporous Metals by Controlling the Dealloying Kinetics of Close-to-Eutectic Alloys

### Supplementary Information

Alex Aziz<sup>a</sup>, Javier Carrasco<sup>a</sup>, and Yaroslav Grosu<sup>a,b,\*</sup>

- a. Centre for Cooperative Research on Alternative Energies (CIC energiGUNE), Basque Research and Technology Alliance (BRTA), Alava Technology Park, Albert Einstein 48, 01510 Vitoria-Gasteiz, Spain, Email: [ygrosu@cicenergigune.com](mailto:ygrosu@cicenergigune.com)
- b. Institute of Chemistry, University of Silesia in Katowice, 40-006 Katowice, Poland

**Table S1.** Structural parameters, experiment versus DFT results at the PBE-D2 level of theory

|                                   |                    | Experiment   |              |              |     | Theory       |              |              |
|-----------------------------------|--------------------|--------------|--------------|--------------|-----|--------------|--------------|--------------|
|                                   | Space group        | <i>a</i> (Å) | <i>b</i> (Å) | <i>c</i> (Å) | Ref | <i>a</i> (Å) | <i>b</i> (Å) | <i>c</i> (Å) |
| Cu                                | Fm-3m              | 3.5942(32)   |              |              | [1] | 3.6264       |              |              |
| Mg                                | P63/mmc            | 3.2093       |              | 5.2103       | [2] | 3.1067       |              | 4.9679       |
| Cu <sub>2</sub> Mg                | Fd-3m              | 7.0210       |              |              | [3] | 7.0157       |              |              |
| CuMg <sub>2</sub>                 | Fddd               | 5.2622(3)    | 9.0207(6)    | 18.310(1)    | [4] | 5.1975       | 8.9120       | 18.3005      |
| CuMgZn                            | Fd-3m              | 7.1690       |              |              | [5] | 7.1305       |              |              |
| *                                 | P4 <sub>1</sub> 22 |              |              |              |     | 5.0399       |              | 7.1364       |
| Mg <sub>21</sub> Zn <sub>25</sub> | R-3C               | 25.7758      |              | 8.7624       | [6] | 25.2428      |              | 8.5316       |

\*Symmetry of the lowest energy substituted configuration is reduced to the tetragonal P4<sub>1</sub>22 space group. However, simulations were performed without imposing symmetry, keeping the structure consistent with the parent unit-cell.

**Table S2.** Energy per atom of the reoriented bulk unit cell for Cu and various Mg surfaces. The energy of the conventional bulk unit-cell was calculated to be -4.145 and -1.831 eV per atom for Cu and Mg respectively at the PBE-D2 level of theory

| Cu        |                  | Mg             |                  |                |                  |
|-----------|------------------|----------------|------------------|----------------|------------------|
| Surface   | Energy eV / atom | Surface        | Energy eV / atom | Surface        | Energy eV / atom |
| (1, 0, 0) | -4.145           | (0, 0, 0, 1)   | -1.831           | (3, 1, -4, 0)  | -1.831           |
| (1, 1, 0) | -4.145           | (1, 0, -1, 1)  | -1.831           | (3, 1, -4, 1)  | -1.830           |
| (1, 1, 1) | -4.145           | (1, 0, -1, 3)  | -1.831           | (3, 1, -4, 2)  | -1.830           |
| (2, 1, 0) | -4.145           | (1, 0, -1, 0)  | -1.831           | (3, 1, -4, 3)  | -1.831           |
| (2, 1, 1) | -4.145           | (1, 0, -1, 2)  | -1.831           | (3, 2, -5, 0)  | -1.831           |
| (2, 2, 1) | -4.145           | (1, 0, -1, 3)  | -1.831           | (3, 2, -5, 1)  | -1.831           |
| (3, 1, 0) | -4.145           | (1, 1, -2, 0)  | -1.831           | (3, 2, -5, 2)  | -1.831           |
| (3, 1, 1) | -4.145           | (1, 1, -2, 1)  | -1.831           | (3, 2, -5, 3)  | -1.831           |
| (3, 2, 0) | -4.144           | (2, 0, -2, 1)  | -1.831           | (3, 3, -6, 1)  | -1.831           |
| (3, 2, 1) | -4.144           | (2, 0, -2, 3)  | -1.831           | (3, 3, -6, 2)  | -1.830           |
| (3, 2, 2) | -4.144           | (2, -1, -1, 3) | -1.831           | (2, -1, -1, 3) | -1.831           |
| (3, 3, 1) | -4.144           | (2, -1, -1, 2) | -1.831           | (3, -1, -2, 3) | -1.831           |
| (3, 3, 2) | -4.144           | (2, 2, -4, 1)  | -1.831           | (3, -1, -2, 0) | -1.831           |
|           |                  | (2, 2, -4, 3)  | -1.831           | (3, -1, -2, 1) | -1.830           |
|           |                  | (3, 0, -3, 1)  | -1.831           | (2, -1, -1, 2) | -1.831           |
|           |                  | (3, 0, -3, 2)  | -1.831           | (3, -1, -2, 2) | -1.830           |

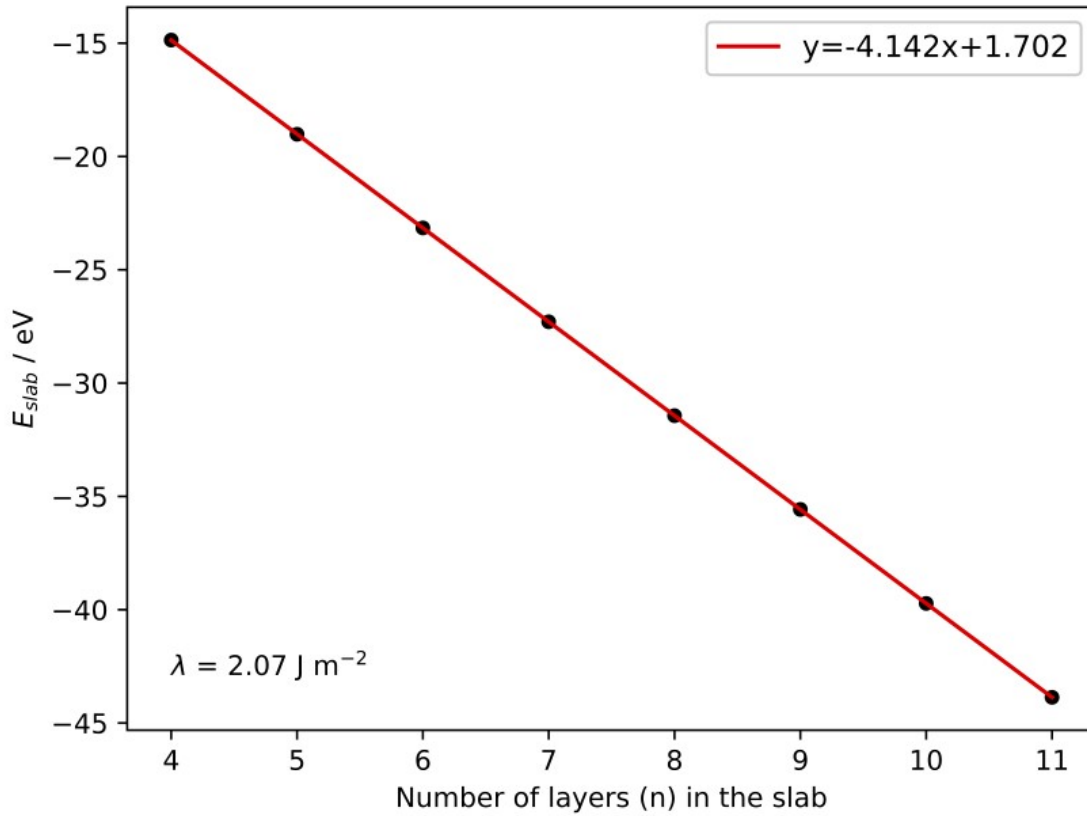

**Fig. S1.** Convergence of the Cu 100 surface with the linear fitting method. The bulk energy of -4.142 eV is calculated as the gradient of the line and within 3 meV per atom to that of the bulk energy using a dense  $k$ -mesh. The surface energy is within  $0.03 \text{ J m}^{-2}$  compared to that obtained using the conventional bulk unit-cell.

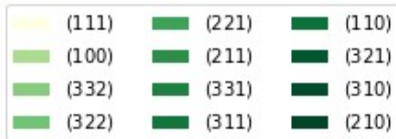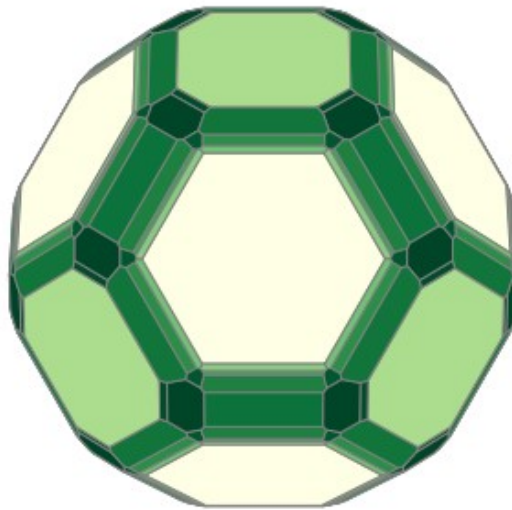

Fig. S2. Calculated Wulff shape for Cu up to a maximum Miller index of three. Generated using Pymatgen.<sup>7</sup>

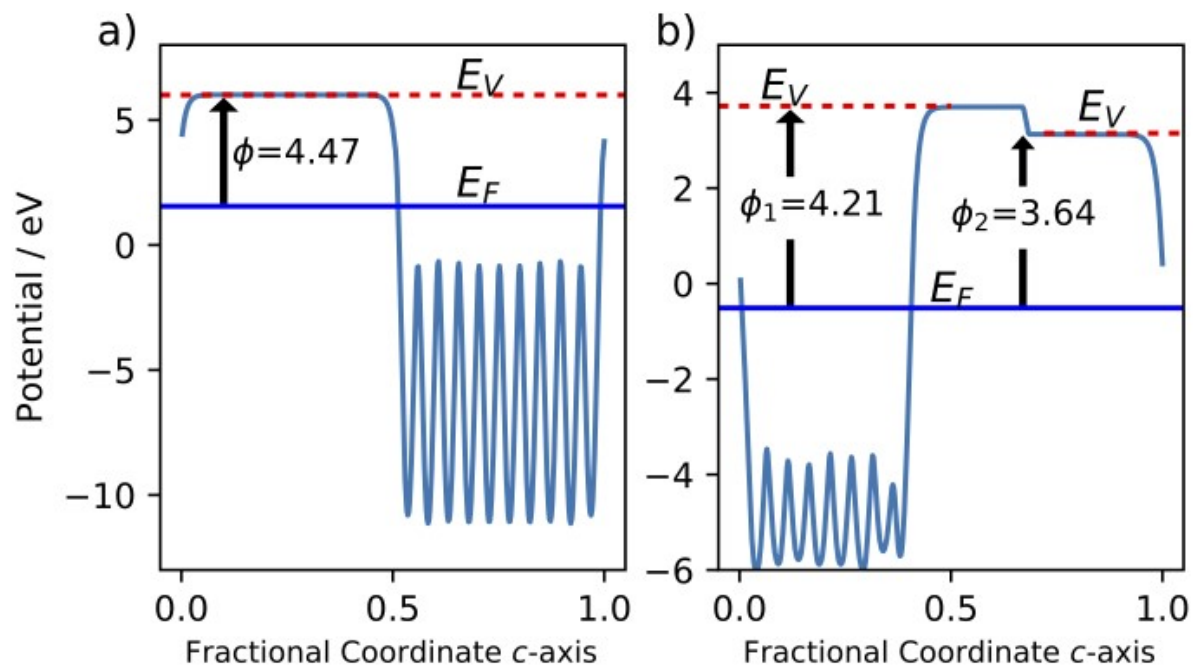

Fig. S3. Planar-averaged electrostatic potential of a) the Cu (100) surface and b) the CuMgZn (100) surface showing 2 work functions due to its asymmetric termination. Cu Zn termination exhibits a workfunction of 4.21 eV and Cu Mg termination exhibits a workfunction of 3.64 eV.

## References

- (1) Shkvarina, E. G.; Titov, A. A.; Shkvarin, A. S.; Plaisier, J. R.; Gigli, L.; Titov, A. N. Thermal Stability of the Layered Modification of  $\text{Cu}_{0.5}\text{ZrTe}_2$  in the Temperature Range 25–900 °C. *Acta Crystallogr. Sect. C Struct. Chem.* **2018**, *74* (9), 1020–1025. <https://doi.org/10.1107/S2053229618009841>.
- (2) Straumanis, M. E. The Precision Determination of Lattice Constants by the Powder and Rotating Crystal Methods and Applications. *J. Appl. Phys.* **1949**, *20* (8), 726–734. <https://doi.org/10.1063/1.1698520>.
- (3) Friauf, J. B. The Crystal Structures of Two Intermetallic Compounds. *J. Am. Chem. Soc.* **1927**, *49* (12), 3107–3114. <https://doi.org/10.1021/ja01411a017>.
- (4) Braga, M. H.; Ferreira, J. J. A.; Siewenie, J.; Proffen, T.; Vogel, S. C.; Daemen, L. L. Neutron Powder Diffraction and First-Principles Computational Studies of  $\text{CuLi}_x\text{Mg}_{2-x}$  ( $X \cong 0.08$ ),  $\text{CuMg}_2$ , and  $\text{Cu}_2\text{Mg}$ . *J. Solid State Chem.* **2010**, *183* (1), 10–19. <https://doi.org/https://doi.org/10.1016/j.jssc.2009.09.010>.
- (5) Ellner, M.; Predel, B. Neutronenbeugungsuntersuchungen an Ternären Laves-Phasen Vom  $\text{MgCu}_2$ -Typ. *J. Solid State Chem.* **1979**, *30* (2), 209–221. [https://doi.org/10.1016/0022-4596\(79\)90103-8](https://doi.org/10.1016/0022-4596(79)90103-8).
- (6) Černý, R.; Renaudin, G. The Intermetallic Compound  $\text{Mg}_{21}\text{Zn}_{25}$ . *Acta Crystallogr. Sect. C* **2002**, *58* (11), i154–i155. <https://doi.org/https://doi.org/10.1107/S0108270102018103>.
- (7) Ong, S. P.; Richards, W. D.; Jain, A.; Hautier, G.; Kocher, M.; Cholia, S.; Gunter, D.; Chevrier, V. L.; Persson, K. A.; Ceder, G. Python Materials Genomics (Pymatgen): A Robust, Open-Source Python Library for Materials Analysis. *Comput. Mater. Sci.* **2013**, *68*, 314–319. <https://doi.org/10.1016/j.commatsci.2012.10.028>.
